# Supplementary material for: The auxin-PLETHORA 5 module regulates wood fibre development in poplar in a non-cell-autonomous manner
Source: Research Square preprint supplement (doi:10.21203/rs.3.rs-3477891/v1), 2023-11-03
Supplement: Supplementary file 1 [file 5b7f482f5526ba7fbe035e72.docx]

**Table S1:** Sequences of oligonucleotide primers and probes used in this study.

| **Name** | **Sequence** |
| --- | --- |
| For plasmid construction | |
| *SND1-A1pro*-1991bp-fw | 5’ GTCGTGCTCCACCATGTTGGCGATATAACCATCAAACAAT 3’ |
| *SND1-A1pro*-1991bp-rv | 5’ GGAGACATTCTAGAGGATCCTTGTATAAAGCTGGCTAG 3’ |
| *SND1-A2pro*-bp-fw | 5’ AGGGCTTGAGGGGACATATT 3’ |
| *SND1-A2pro*-bp-rv | 5’ AGAGGGTGCGTAAAGGGTAA 3’ |
| *SND1-B1pro*-bp-fw | 5’ GCTTGATCTGGTCTTATCTG 3’ |
| *SND1-B1pro*-bp-rv | 5’ TAGTGGTGGAGTAACTGAAA 3’ |
| *SND1-B2pro*-bp-fw | 5’ TTCGATTATGTATTAGGGG 3’ |
| *SND1-B2pro*-bp-rv | 5’ ATGAGGGAGTGAGGAAGAG 3’ |
| *PLT5a*-CDS-fw | 5’ CAGAGGAAACAGAAACCCAA 3’ |
| *PLT5a*-CDS-rv | 5’ CAGTGCCATCGTTACAAGAA 3’ |
| *PLT5b*-CDS-fw | 5’ TCTTGCTTGATATTCGTCTC 3’ |
| *PLT5b*-CDS-rv | 5’ TTCGAGTCAAGTAAAACATAAT 3’ |
| *PLT5a*-ORF-fw | 5’ AAGCCAATACTTGTATGGATGGATTCTACTTCTCATCA 3’ |
| *PLT5a*-ORF-rv | 5’ TCCCCAATACTTGTATGGTCATTCCATTCCAAAAATAG 3’ |
| *PLT5a*/*b*-Cas9-U3b-fw | 5’ GTCATACAGTAGTAGCCGTAGTCC 3’ |
| *PLT5a*/*b*-Cas9-U3b-rv | 5’ AAACGGACTACGGCTACTACTGTA 3’ |
| *PLT5a*/*b*-Cas9-U3d-fw | 5’ GTCACCAGAGGAGCCTCAATTTAC 3’ |
| *PLT5a*/*b*-Cas9-U3d-rv | 5’ AAACGTAAATTGAGGCTCCTCTGG 3’ |
| *PLT5a*/*b*-Cas9-U6-1-fw | 5’ ATTGTTTAACACCACCACTACCTC 3’ |
| *PLT5a*/*b*-Cas9-U6-1-rv | 5’ AAACGAGGTAGTGGTGGTGTTAAA 3’ |
| *PLT5a*/*b*-Cas9-U6-29-fw | 5’ ATTGTAGAGAACTGACCACACAG 3’ |
| *PLT5a*/*b*-Cas9-U6-29-rv | 5’ AAACCTGTGTGGTCAGTTCTCTA 3’ |
| *PLT5apro*-1872bp-fw | 5’ GCCAAGCTTGGATCCGCCGTTGTATTTGCTAAAGT 3’ |
| *PLT5apro*-1872bp-rv | 5’ CTTGCCCATGGATCCCTGTTGTTGATGCTGGTGTA 3’ |
| *PLT5apro*-1×YFP-fw | 5’ GCCAGTGCCAAGCTTGCCGTTGTATTTGCTAAAGT 3’ |
| *PLT5apro*-1×YFP-rv | 5’ AGAAGTAGAATCCATCTGTTGTTGATGCTGGTGTA 3’ |
| *PLT5a*-CDS-1×YFP-fw | 5’ CACCAGCATCAACAACAGATGGATTCTACTTCTCATCAGA 3’ |
| *PLT5a*-CDS-1×YFP-rv | 5’ CTCCTCGCCCTTGCCCATTTCCATTCCAAAAATAGGTG 3’ |
| *PLT5apro*-*PLT5a*-YFP-fw | 5’ ACGGCCAGTGCCAAGCTTGCCGTTGTATTTGCTAAAGT 3’ |
| *PLT5apro*-*PLT5a*-YFP-rv | 5’ CTCCTCGCCCTTGCCCATCTTGTACAGCTCGTCCATGC 3’ |
| 3×YFP-fw | 5’ CGGCATGGACGAGCTGTACAAGATGGGCAAGGGCGAG 3’ |
| 3×YFP-rv | 5’ CTCCTCGCCCTTGCCCATCTTGTACAGCTCGTCCATGC 3’ |
| *SND1*-*A1*-ORF-fw | 5’ AAGCCAATACTTGTATGGATGCCTGACGATATGGTGAA 3’ |
| *SND1*-*A1*-ORF-rv | 5’ TCCCCAATACTTGTATGGTTATACTGACAAGTGGCATA 3’ |
| For PCR genotyping | |
| *Hyg*-fw | 5’ ATCGGACGATTGCGTCGCATC 3’ |
| *Hyg*-rv | 5’ GTGTCACGTTGCAAGACCTG 3’ |
| *Kana*-fw | 5’ GTCGACATGGATGGATTGCACG 3’ |
| *Kana*-rv | 5’ GTCGACTCAGAAGAACTCGTCAAGAAG 3’ |
| *SND1-A1pro*-*IAA9m*-fw | 5’ GAAGAGGAGGTAGAGGGAGA 3’ |
| *SND1-A1pro*-*IAA9m*-rv | 5’ CCTAAATGATTTGATGGGTG 3’ |
| *WOX4apro*-*IAA9m*-fw | 5’ TAGGCTATGGCTTGTTTACG 3’ |
| *WOX4apro*-*IAA9m*-rv | 5’ CATTGCATTTACCTCCGAAT 3’ |
| *WOX4apro*-*PLT5a*-fw | 5’ CCGAAAAGCATGGACACCTT 3’ |
| *WOX4apro*-*PLT5a*-rv | 5’ GAGGTAGTGGTGGGTGTAGT 3’ |
| For qRT-PCR | |
| *PLT5a*-q-fw | 5’ ATCAGAACTGGCTCGGTTTC 3´ |
| *PLT5a-*q-rv | 5’ TTGGTCTACAGGCAGCTACT 3’ |
| *PLT5b*-q-fw | 5’ TCAATCTTCCACAAGCGGTC 3’ |
| *PLT5b*-q-rv | 5’ TATGGAAGGCGATGGGTGTA 3’ |
| *SND1-A1*-q-fw | 5’ TAGGCTTGATGACAGCACCCATGAA 3’ |
| *SND1-A1*-q-rv | 5’ TCTAAATACCCGGCAAACCACCCAA 3’ |
| *SND1-A2*-q-fw | 5’ TCCGGGCAACTTAACGATTGGGTA 3’ |
| *SND1-A2*-q-rv | 5’ GCATTTGGGCCGGTAGTAAAGCA 3’ |
| *SND1-B1*-q-fw | 5’ AACTGGGCAACCCTTGATCGTCTA 3’ |
| *SND1-B1*-q-rv | 5’ GTAATGGTTGGGTCAATGCAGGGT 3’ |
| *SND1-B2*-q-fw | 5’ AGACTCTGGCCTTAACAACTGGGT 3’ |
| *SND1-B2*-q-rv | 5’ AGCACGCTGATTGCCTAGAGGTTT 3’ |
| *CesA7*-q-fw | 5’ AAATGGCGCAAATGGGGATG 3’ |
| *CesA7*-q-rv | 5’ GGGGCAGAGTCTACACACAT 3’ |
| *COMT2*-q-fw | 5’ ATGGCACGGATCCAAGATTC 3’ |
| *COMT2*-q-rv | 5’ CGTGGGGCAGATCAAAGTTA 3’ |
| *MYB021*-q-fw | 5’ ATGTCGACCATGCAAGAACA 3’ |
| *MYB021*-q-rv | 5’ GGACTCCAACTTGAGCCAT 3’ |
| *MYB093*-q-fw | 5’ AAGTGCAGCCTGAGTTTACG 3’ |
| *MYB093*-q-rv | 5’ TAGAGACTGACACGGAAGGC 3’ |
| *MYB175*-q-fw | 5’ TTCGCAAGTTGGTGGATCAG 3’ |
| *MYB175*-q-rv | 5’ TTGCCATGAATCTGCTGACA 3’ |
| *IAA9m*-q-fw | 5’ TACTGAATTGCGGCTTGGG 3’ |
| *IAA9m*-q-rv | 5’ CTCTGAAAACTCATCCATGGCAT 3’ |
| *UBQ-q-fw* | 5’ GTTGATTTTTGCTGGGAAGC 3’ |
| *UBQ-q-rv* | 5’ GTTGATTTTTGCTGGGAAGC 3’ |
| For RNA in Situ hybridization | |
| *PLT5*-antisense-fw | 5’ TCGCACCAAGCACTTTACTTCAATCTTCCACAGGTTTTCCTGCT 3’ |
| *PLT5*-antisense-T7-rv | 5’ ATCGTAATACGACTCACTATAGGGAAGGCAATGGGTGTAGCAAA 3’ |
| *PLT5*-sense-T7-fw | 5’ ATCGTAATACGACTCACTATAGGGTCGCACCAAGCACTTTACTT 3’ |
| *PLT5*-sense-rv | 5’ AAGGCAATGGGTGTAGCAAATGGAATACTCGAACTTGATGATGA 3’ |
| For ChIP assays | |
| *PLT5apro*-I-fw | 5’ TGAACAATGCGTCTGCATAGTG 3’ |
| *PLT5apro*-I-rv | 5’ CGAGATGAATATTGTGCAGTTGCA 3’ |
| *PLT5apro*-II-fw | 5’ TAGAGAGAGAGAGAGAGAGAGAGAGAG 3’ |
| *PLT5apro*-II-rv | 5’ CGAAGATCGAGGGCTTTGTAAT 3’ |
| *PLT5apro*-III-fw | 5’ GAACTCGGATCATGAACTTAACCGA 3’ |
| *PLT5apro*-III-rv | 5’ TGTGAGAGGTGAACATTGTGTAGC 3’ |
| *PLT5apro*-NC-fw | 5’ ACACTGTGGACTTACACGGT 3’ |
| *PLT5apro*-NC-rv | 5’ GTGTAAATCCACGGTGTGTTTCC 3’ |
| *SND1-A1pro*-I-fw | 5’ CCCACCATTTTGTGGGTACA 3’ |
| *SND1-A1pro*-I-rv | 5’ CAAAAGGTGCCCTTAAGAAAACA 3’ |
| *SND1-A1pro*-II-fw | 5’ CATGATGTGCACAGTTGGTG 3’ |
| *SND1-A1pro*-II-rv | 5’ CCACCTCAACGACAAGAGG 3’ |
| *SND1-A1pro*-III-fw | 5’ TGCACAAGTAAAACGAGTGATG 3’ |
| *SND1-A1pro*-III-rv | 5’ CTGAAACCACCACCATGCTA 3’ |
| *SND1-A1pro*-IV-fw | 5’ CCCCCTGCACATACAAATACA 3’ |
| *SND1-A1pro*-IV-rv | 5’ TAGGCCAATTGGGTCCATCA 3’ |
| *SND1-A1pro*-NC-fw | 5’ TGCATTTTTGGACCCTTCCC 3’ |
| *SND1-A1pro*-NC-rv | 5’ TAAAGCTGGCTAGGGAGTGA 3’ |
| *SND1-A2pro*-I-fw | 5’ GAGTGTGCTAGACTTGTGCT 3’ |
| *SND1-A2pro*-I-rv | 5’ GCGCAGCGGTAGAATTATTG 3’ |
| *SND1-A2pro*-II-fw | 5’ TGTGCTTCTGCCATGATGTA 3’ |
| *SND1-A2pro*-II-rv | 5’ CAACCACCTCAACGACAAGA 3’ |
| *SND1-A2pro*-III-fw | 5’ TCCTGCTCGCACAAATACAA 3’ |
| *SND1-A2pro*-III-rv | 5’ GTGAGGGAACGGTCCAAAAA 3’ |
| *SND1-A2pro*-NC-fw | 5’ TTAGATGCCTTTCTCGCCAC 3’ |
| *SND1-A2pro*-NC-rv | 5’ GTCCAAGGGGAGTCCTACAT 3’ |
| *SND1-B1pro*-I-fw | 5’ TCATGTGCTCAATGAATTGTAACT 3’ |
| *SND1-B1pro*-I-rv | 5’ CGCGTTCAAGACAAAGAAGG 3’ |
| *SND1-B1pro*-II-fw | 5’ ACCATAACACGTTGCCGAC 3’ |
| *SND1-B1pro*-II-rv | 5’ CCCCCATCGCAACTATGAC 3’ |
| *SND1-B1pro*-III-fw | 5’ TACCCTACTCATGGACCCAC 3’ |
| *SND1-B1pro*-III-rv | 5’ ATGTGCGGCAGGACATAAAA 3’ |
| *SND1-B1pro*-NC-fw | 5’ CAAGAAAAACGTGAATTCTCCTCC 3’ |
| *SND1-B1pro*-NC-rv | 5’ CAACCTTCCATGTGATCATTGAATA 3’ |
| *SND1-B2pro*-I-fw | 5’ GCTAGCACATACATCCTAGATTCA 3’ |
| *SND1-B2pro*-I-rv | 5’ CGTGTGTGTGAGCAGTACAA 3’ |
| *SND1-B2pro*-II-fw | 5’ TGGTGGTTGCACAAACAAAAC 3’ |
| *SND1-B2pro*-II-rv | 5’ TAGACTACAGAGGGAACGCC 3’ |
| *SND1-B2pro*-III-fw | 5’ GCTCTTATCAGACGCACAGT 3’ |
| *SND1-B2pro*-III-rv | 5’ TTGGTGGTGTACCAAAATGAGT 3’ |
| *SND1-B2pro*-NC-fw | 5’ GGCTCTGATACCATGTCAAAGA 3’ |
| *SND1-B2pro*-NC-rv | 5’ AGGCAACTTTAGCTGGGTTC 3’ |
| For EMSA | |
| *ARF5.1*-*B3*-fw | 5’ CCGAATTCCCGGGTCGACTCGATGAGTCTTCAACCAGTGAACAC 3’ |
| *ARF5.1*-*B3*-rv | 5’ TCAGTCAGTCACGATGCGGCCTAACTGTGACTTTTCATCCCTGAT 3’ |
| *PLT5a*-*AP2*-fw | 5’ AGCAAATGGGTCGCGGATCCGAACATGCACCAAAGAAAAC 3’ |
| *PLT5a*-*AP2*-rv | 5’ GCGGCCGCAAGCTTGTCGACGCTGCTACTGTTCTTGGTAT 3’ |
| *PLT5apro*-III-fw | 5’ TAATGTCTGTCTGTCTGTCTGTCTGTCGTT 3’ |
| *PLT5apro*-III-rv | 5’ AACGACAGACAGACAGACAGACAGACATTA 3’ |
| *PLT5apro*-IIIm-fw | 5’ AACTAGCTAGCTAGCTAGCTAGCTAGGTT 3’ |
| *PLT5apro*-IIIm-rv | 5’ AACCTAGCTAGCTAGCTAGCTAGCTAGTTA 3’ |
| *SND1*-*A1pro*-IV-fw | 5’ GTTGCACAGCACAGCACAAGT 3’ |
| *SND1*-*A1pro*-IV-rv | 5’ ACTTGTGCTGTGCTGTGCAAC 3’ |
| *SND1*-*A1pro*-IVm-fw | 5’ GTTCAACACAACACAACAAGT 3’ |
| *SND1*-*A1pro*-IVm-rv | 5’ ACTTGTTGTGTTGTGTTGAA 3’ |
| For effector-reporter assays | |
| *PLT5apro*-I-fw | 5’ TATAGGGCGAATTGGGTACCCGAACTCGGATCATGAACT 3’ |
| *PLT5apro*-I-rv | 5’ GTTTTTGGCGTCTTCCATGGGTTTTACCGTGAACGACAT 3’ |
| *PLT5apro*-Im-rv | 5’ GTTTTTGGCGTCTTCCATGGGTTTTACCGTGAACTCAGT 3’ |
| *PLT5apro*-III-fw | 5’ TATAGGGCGAATTGGGTACCCCCCACACGCTGTAGTTTAT 3’ |
| *PLT5apro*-III-rv | 5’ GTTTTTGGCGTCTTCCATGGTTGCACTGTTTGTCTCCTCA 3’ |
| *PLT5apro*-III-rv | 5’ GTTTTTGGCGTCTTCCATGGTTGCACTGTTATCGATCTCA 3’ |
| *SND1-A1pro*-IV-fw | 5’ TATAGGGCGAATTGGGTACCTGCACAAGTAAAACGAGTGA 3’ |
| *SND1-A1pro*-IVm-fw | 5’ TATAGGGCGAATTGGGTACCTCCAAAAGTAAAACGAGTGA 3’ |
| *SND1-A1pro*-IV-rv | 5’ GTTTTTGGCGTCTTCCATGGCTACGACCCATGACCTGAAT 3’ |
| *SND1-A2pro*-I-fw | 5’ TATAGGGCGAATTGGGTACCGAGTGTGCTAGACTTGTGCT 3’ |
| *SND1-A2pro*-Im-fw | 5’ TATAGGGCGAATTGGGTACCGAGCAACATAGACTCAACAT 3’ |
| *SND1-A2pro*-I-rv | 5’ GTTTTTGGCGTCTTCCATGGGCGCAGCGGTAGAATTATTG 3’ |
| *SND1-B1pro*-I-fw | 5’ TATAGGGCGAATTGGGTACCTCATGTGCTCAATGAATTGT 3’ |
| *SND1-B1pro*-Im-fw | 5’ TATAGGGCGAATTGGGTACCTCACAACATCAATGAATTGT 3’ |
| *SND1-B1pro*-I-rv | 5’ GTTTTTGGCGTCTTCCATGGCGCGTTCAAGACAAAGAAGG 3’ |
| *SND1-B2pro*-II-fw | 5’ TATAGGGCGAATTGGGTACCTGGTGGTTGCACAAACAAAA 3’ |
| *SND1-B2pro*-IIm-fw | 5’ TATAGGGCGAATTGGGTACCTGGTGGTTTGTTGAACAAAA 3’ |
| *SND1-B2pro*-II-rv | 5’ GTTTTTGGCGTCTTCCATGGTAGACTACAGAGGGAACGCC 3’ |

Note: The sequences of homolog arms are underlined.
